# Supplementary material for: The crystal structure and optical properties of a pharmaceutical co-crystal – the case of the melamine–barbital addition compound
Source: Royal Society of Chemistry journal article supplement (doi:10.1039/c4ce00178h), 2014-01-01
Supplement: c4ce00178h1.pdf [file c4ce00178h1.pdf]

## Electronic Supplementary Information

For

### Crystal structure and optical properties of a pharmaceutical co-crystal - the case of melamine-barbital addition compound

**M. Gryl,<sup>a</sup> K. Stadnicka,<sup>a</sup> T. Seidler,<sup>a</sup> I. Matulková<sup>b</sup>, I. Němec<sup>b</sup>,  
N. Tesařová<sup>c</sup>, P. Němec<sup>c</sup>**

<sup>a</sup> Jagiellonian University, Faculty of Chemistry, Department of Crystal Chemistry and Crystal Physics, Ingardena 3, 30-060 Kraków, Poland. Email: gryl@chemia.uj.edu.pl

<sup>b</sup> Charles University in Prague, Faculty of Science, Department of Inorganic Chemistry, Hlavova 2030, 128 40 Prague 2, Czech Republic.

<sup>c</sup> Charles University in Prague, Faculty of Mathematics and Physics, Department of Chemical Physics and Optics, Ke Karlovu 3, 121 16 Prague 2, Czech Republic.

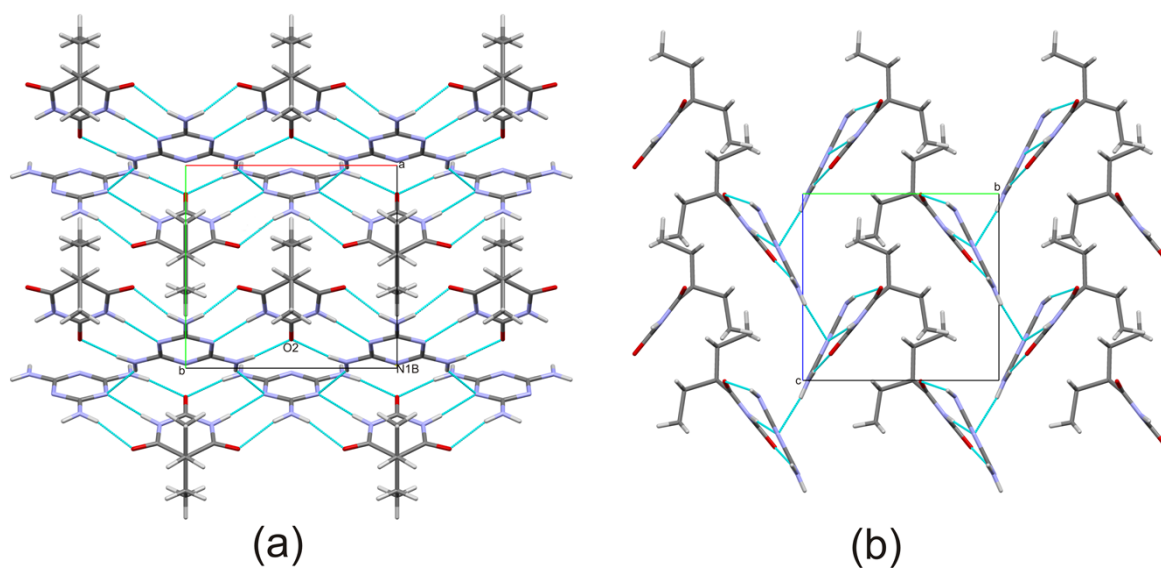

**Fig. S1** (a) Packing of the melamine and barbital molecules viewed along [001]. The infinite crinkled tapes are running along [100]. (b) View of crystal structure along [100] direction. Polar twofold axis is parallel to c. Drawings were prepared in Mercury (C. F. Macrae, P. R. Edgington, P. McCabe, E. Pidcock, G. P. Shields, R. Taylor, M. Towler and J. van de Streek, *J. Appl. Crystallogr.*, 2006, 39, 453.).

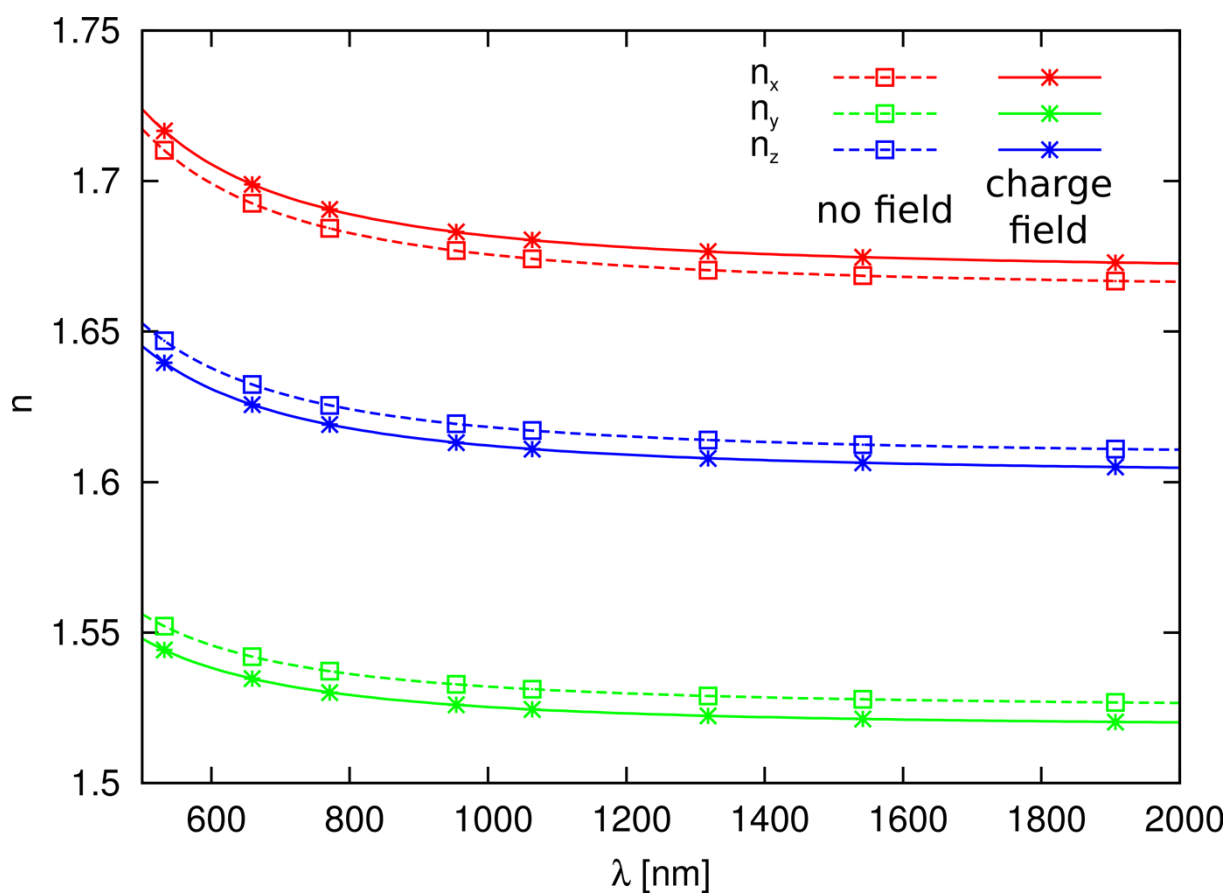

**Fig. S2** Theoretically predicted refractive indices for the investigated crystal at MP2 level of theory (geometry II).

**Table S1 Hydrogen bonds for I [Å,°]**

| D-H...A                | d(D-H)  | d(H...A) | d(D...A) | <(DHA) |
|------------------------|---------|----------|----------|--------|
| N(4B)-H(4B)...O(4A)#1  | 0.95(1) | 2.04(1)  | 2.972(1) | 167(1) |
| N(2B)-H(2B2)...O(2A)   | 0.97(1) | 1.98(1)  | 2.950(1) | 173(1) |
| N(1A)-H(1A)...N(3B)    | 0.99(1) | 1.93(1)  | 2.912(1) | 175(1) |
| N(2B)-H(2B1)...N(3B)#3 | 0.95(1) | 2.36(1)  | 3.170(1) | 144(1) |

Symmetry transformations used to generate equivalent atoms:

#1 -x,y,z #2 -x+1,y,z #3 -x+1/2,-y,z-1/2

**Table S2** Selected (a) bond lengths, (b) valence angles (c) torsion angles at the experimental, A and B geometry.

| <b>(a)</b> |            |          |          |
|------------|------------|----------|----------|
|            | <b>exp</b> | <b>A</b> | <b>B</b> |
| O2A - C2A  | 1.224(2)   | 1.231    | 1.209    |
| C4A - O4A  | 1.218(1)   | 1.224    | 1.211    |
| N1A - H1A  | 0.990(1)   | 1.377    | 1.013    |
| N3B - C2B  | 1.357(1)   | 1.359    | 1.341    |
| N4B - H4B  | 0.952(1)   | 1.018    | 1.006    |
| N1A - C4A  | 1.374(1)   | 1.377    | 1.389    |
| N1A - C2A  | 1.371(1)   | 1.374    | 1.388    |
| C5A - C4A  | 1.514(1)   | 1.521    | 1.531    |
| C5A-C7A    | 1.562(2)   | 1.570    | 1.558    |
| C5A-C8A    | 1.549(2)   | 1.550    | 1.558    |
| C7A - H71  | 0.996(1)   | 1.093    | 1.092    |
| C8A - H81  | 0.992(1)   | 1.093    | 1.092    |
| C9A - H91  | 0.988(1)   | 1.094    | 1.094    |
| C10A- H11  | 0.979(1)   | 1.093    | 1.094    |
| N2B - C2B  | 1.336(1)   | 1.340    | 1.359    |
| N2B - H2B2 | 0.967(1)   | 1.017    | 1.006    |
| N2B-H2B1   | 0.948(1)   | 1.017    | 1.006    |
| N1B - C2B  | 1.344(1)   | 1.344    | 1.341    |
| N3B - C4B  | 1.349(1)   | 1.352    | 1.340    |
| N4B - C4B  | 1.339(2)   | 1.340    | 1.360    |
| C7A - C10A | 1.524(3)   | 1.529    | 1.531    |
| C8A - C9A  | 1.525(3)   | 1.528    | 1.531    |
| C9A - H92  | 0.985(1)   | 1.093    | 1.092    |
| C10A-H11   | 0.979(1)   | 1.093    | 1.094    |
| C10A- H12  | 0.997(1)   | 1.095    | 1.093    |

| <b>(b)</b>   |            |          |          |
|--------------|------------|----------|----------|
|              | <b>exp</b> | <b>A</b> | <b>B</b> |
| C2A-N1A-C4A  | 125.5(1)   | 125.5    | 127.9    |
| C5A-C4A-O4A  | 121.7(1)   | 121.6    | 122.3    |
| O2A-C2A-N1A  | 121.4(1)   | 121.4    | 122.8    |
| C5A-C4A-N1A  | 118.2(1)   | 118.0    | 117.5    |
| N1A-C4A-O4A  | 120.0(1)   | 120.3    | 120.1    |
| C4A-C5A-C8A  | 110.1(1)   | 110.4    | 108.3    |
| C4A-C5A-C7A  | 107.2(1)   | 106.9    | 108.3    |
| C8A-C5A-C7A  | 108.3(1)   | 108.4    | 108.9    |
| C9A-C8A-C5A  | 114.4(2)   | 115.5    | 115.2    |
| C10A-C7A-C5A | 115.8(1)   | 117.0    | 115.2    |
| C4B-N3B-C2B  | 114.7(1)   | 115.1    | 115.2    |
| N3B-C4B-N4B  | 117.5(1)   | 117.8    | 116.9    |
| N3B-C2B-N2B  | 116.7(1)   | 116.7    | 116.9    |
| N1B-C2B-N2B  | 117.8(1)   | 118.2    | 116.9    |
| N3B-C2B-N1B  | 125.5(1)   | 125.1    | 126.1    |

| <b>(c)</b>            |            |          |          |
|-----------------------|------------|----------|----------|
|                       | <b>exp</b> | <b>A</b> | <b>B</b> |
| O2A - C2A - N1A - C4A | 177.8(1)   | 176.9    | -180     |
| C2A - N1A - C4A - C5A | 9.0(1)     | 10.3     | 0.0      |
| C2A - N1A - C4A - O4A | -173.9(1)  | -173.1   | 180.0    |
| C2B - N3B - C4B - N4B | 179.9(1)   | 179.6    | 178.3    |
| C4B - N3B - C2B - N1B | -1.0(1)    | -0.9     | -0.2     |
| C4B - N3B - C2B - N2B | 179.2(1)   | 179.0    | 178.8    |

**Table S3** Effect of the electric field on the selected molecular properties of melamine and barbital as obtained at MP2/6-311++G(d,p) level of theory. The average electric field strength is of the order of ca. 0.5 and 2.5 GV/m for barbital and melamine, respectively. Polarizability  $\alpha$  [ $\text{\AA}^3$ ], first hyperpolarizability  $\beta$  [ $10^{-30}$  esu] and dipole moment  $\mu$  [D].

| molecule | electric field               | $\alpha_{\text{iso}}$ | $ \beta_{\text{vec}} $ | $ \mu $ |
|----------|------------------------------|-----------------------|------------------------|---------|
| melamine | no field (A)                 | 12.8                  | 0.07                   | 0.42    |
|          | no field (B)                 | 12.8                  | 0.20                   | 1.14    |
|          | charge field<br>(geometry B) | 12.9                  | 0.36                   | 1.54    |
| barbital | no field (geometry A)        | 16.8                  | 0.95                   | 0.96    |
|          | no field (geometry B)        | 16.9                  | 0.91                   | 1.09    |
|          | charge field<br>(geometry B) | 16.9                  | 0.99                   | 1.69    |

**Table S4** RLFTn calculations results for  $\chi^{(2)}$  tensor components (in pm/V) for the investigated cocrystal.

| method  | $\lambda$ / nm | $\chi^{(2)}_{113}=\chi^{(2)}_{311}$ | $\chi^{(2)}_{233}=\chi^{(2)}_{322}$ | $\chi^{(2)}_{333}$ |
|---------|----------------|-------------------------------------|-------------------------------------|--------------------|
| MP2 (A) | $\infty$       | -5.4                                | 0.3                                 | 3.5                |
|         | 1064           | -7.6                                | 0.5                                 | 4.9                |
| MP2 (B) | $\infty$       | -5.5                                | 0.5                                 | 2.7                |
|         | 1064           | -8.0                                | 0.9                                 | 4.1                |
| MP2 (B) | $\infty$       | -6.4                                | 0.8                                 | 2.7                |
|         | 1064           | -8.1                                | 0.9                                 | 3.4                |



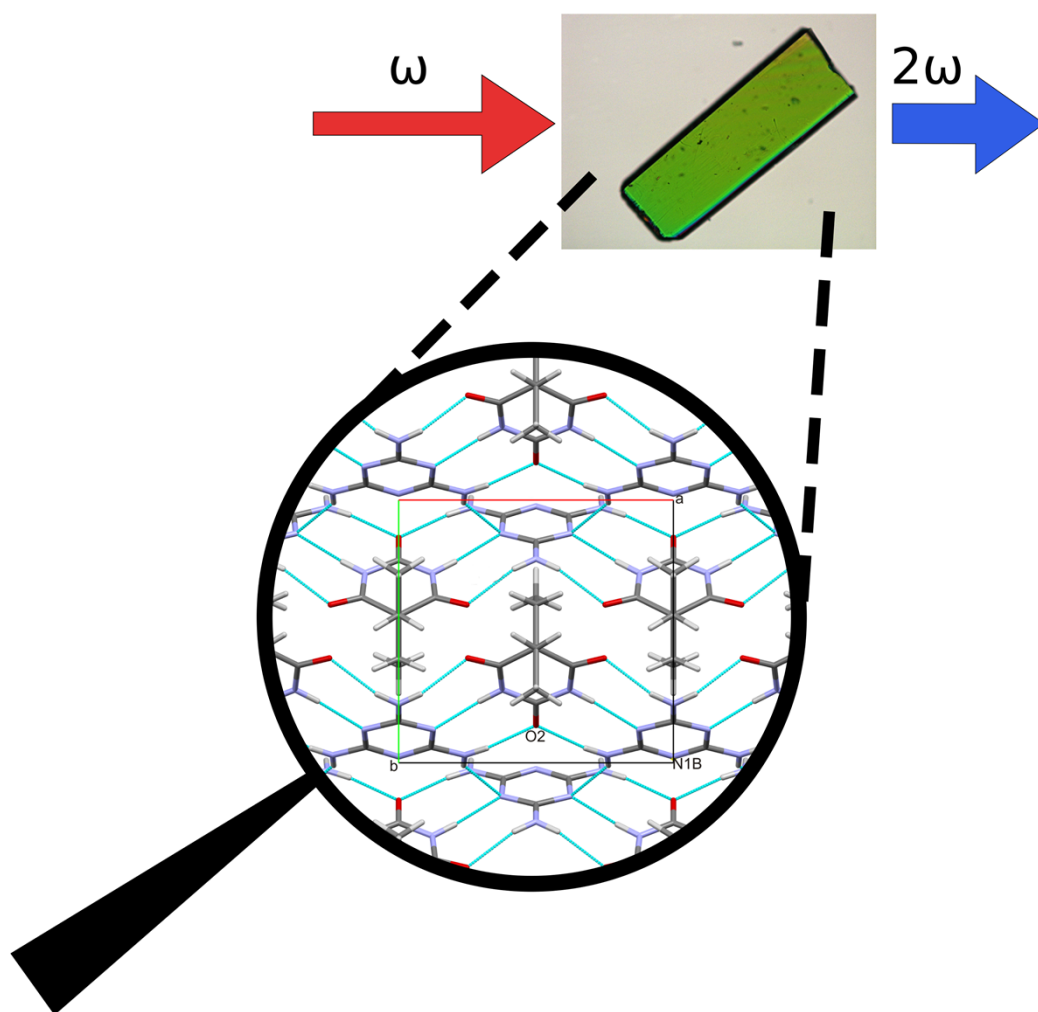

### Graphical Abstract

Pleochroic crystal of melamine barbitol addition compound viewed under the polarizing microscope in transmitted light under 100x magnification. Red and Blue arrows indicate incident and second harmonic beam respectively. A fragment of crystal packing showing mutual orientation of melamine and barbitol molecules, viewed along the *c* direction is presented under the magnifier.
